# Supplementary material for: Improving size selectivity of round pot for Charybdis japonica by configuring escape vents in the Yellow Sea, China
Source: PeerJ. 2021 Oct 8;9:e12282. doi: 10.7717/peerj.12282 (PMC8504466; doi:10.7717/peerj.12282)
Supplement: Supplemental Information 1 — These data were used for statistical analysis to compare the size selectivity and catch efficiency of pots with different modifications. [file peerj-09-12282-s001.xlsx]

## Sheet: Sheet1
Date	Trip_id	Effort_hour	Trap_number	Window_size	C_L	C_W	C_H	Weight
2020.08.20	1	48	10	Control	23	35	12	6.6
2020.08.20	1	48	10	Control	24	35	12	6.41
2020.08.20	1	48	10	Control	30	45	15	17.23
2020.08.20	1	48	10	Control	28	45	13	51.42
2020.08.20	1	48	10	Control	31	41	15	21.98
2020.08.20	1	48	10	Control	33	40	16	14
2020.08.20	1	48	10	Control	46	62	20	36.01
2020.08.20	1	48	10	Control	40	53	21	27.09
2020.08.20	1	48	10	Control	40	60	20	44.32
2020.08.20	1	48	10	Control	40	61	20	35.04
2020.08.20	1	48	10	Control	38	50	22	22.2
2020.08.20	1	48	10	Control	40	62	20	40.16
2020.08.20	1	48	10	Control	52	66	26	34.12
2020.08.20	1	48	10	Control	44	63	23	32.09
2020.08.20	1	48	10	Control	45	59	24	42.09
2020.08.20	1	48	10	Control	44	64	24	41.3
2020.08.20	1	48	10	Control	45	64	25	52.73
2020.08.20	1	48	10	Control	52	71	29	64.31
2020.08.20	1	48	10	Control	52	73	29	56.49
2020.08.20	1	48	10	Control	49	70	28	75.79
2020.08.20	1	48	10	Control	50	69	28	59.8
2020.08.20	1	48	10	Control	63	92	35	185.3
2020.08.20	1	48	10	Control	64	94	37	191.03
2020.08.20	1	48	10	Control	64	86	36	92.31
2020.08.20	1	48	10	70×20 mm	35	46	17	15.05
2020.08.20	1	48	10	70×20 mm	43	64	22	34.63
2020.08.20	1	48	10	70×20 mm	43	55	22	35.59
2020.08.20	1	48	10	70×20 mm	42	61	22	64.87
2020.08.20	1	48	10	70×20 mm	42	62	22	31.2
2020.08.20	1	48	10	70×20 mm	51	72	26	61.23
2020.08.20	1	48	10	70×20 mm	47	70	26	32.18
2020.08.20	1	48	10	70×20 mm	45	67	23	42.3
2020.08.20	1	48	10	70×20 mm	49	67	27	55.14
2020.08.20	1	48	10	70×20 mm	50	71	28	62.33
2020.08.20	1	48	10	70×20 mm	54	70	29	66.51
2020.08.20	1	48	10	70×20 mm	55	78	30	99.02
2020.08.20	1	48	10	70×20 mm	65	87	37	119.89
2020.08.20	1	48	10	70×20 mm	61	82	37	108.69
2020.08.20	1	48	10	70×25 mm	40	54	20	27.39
2020.08.20	1	48	10	70×25 mm	45	63	22	28.01
2020.08.20	1	48	10	70×25 mm	50	67	26	30.76
2020.08.20	1	48	10	70×25 mm	50	70	26	60.56
2020.08.20	1	48	10	70×25 mm	48	64	25	44.8
2020.08.20	1	48	10	70×25 mm	52	73	29	68.21
2020.08.20	1	48	10	70×25 mm	58	79	31	76.05
2020.08.20	1	48	10	70×25 mm	55	77	30	94.26
2020.08.20	1	48	10	70×25 mm	64	100	36	174.53
2020.08.20	1	48	10	70×25 mm	64	86	36	179
2020.08.20	1	48	10	70×30 mm	51	71	26	47.07
2020.08.20	1	48	10	70×30 mm	55	76	31	80.42
2020.08.20	1	48	10	70×30 mm	52	72	28	59.17
2020.08.20	1	48	10	70×30 mm	56	77	31	92.41
2020.08.20	1	48	10	70×30 mm	59	81	33	96.54
2020.08.20	1	48	10	70×30 mm	66	94	36	150.69
2020.08.20	1	48	10	70×30 mm	75	106	40	267.89
2020.08.20	1	48	10	70×35 mm	52	71	29	53.78
2020.08.20	1	48	10	70×35 mm	62	83	35	130.76
2020.08.20	1	48	10	70×35 mm	65	88	37	117.65
2020.08.20	1	48	10	Control	55	76	31	84.72
2020.08.20	1	48	10	Control	64	85	37	185.47
2020.08.20	1	48	10	Control	64	87	37	117.54
2020.08.20	1	48	10	70×20 mm	51	70	29	70.34
2020.08.20	1	48	10	70×20 mm	57	76	31	99.54
2020.08.20	1	48	10	70×20 mm	66	90	37	181.11
2020.08.20	1	48	10	70×20 mm	71	101	39	218.45
2020.08.20	1	48	10	70×25 mm	52	73	29	59.98
2020.08.20	1	48	10	70×25 mm	52	74	29	56.18
2020.08.20	1	48	10	70×25 mm	64	87	36	214.67
2020.08.20	1	48	10	70×25 mm	71	101	39	220.98
2020.08.20	1	48	10	70×30 mm	59	82	33	107.88
2020.08.20	1	48	10	70×30 mm	50	69	26	59.46
2020.08.20	1	48	10	70×30 mm	66	94	36	153.48
2020.08.20	1	48	10	70×35 mm	60	82	33	154.28
2020.08.20	1	48	10	70×35 mm	59	84	35	120.63
2020.08.20	1	48	10	70×35 mm	57	77	31	84.62
2020.08.20	1	48	10	70×35 mm	58	79	31	83.21
2020.08.20	1	48	10	Control	28	37	12	15.2
2020.08.20	1	48	10	Control	28	37	12	16.79
2020.08.20	1	48	10	Control	35	50	17	20.94
2020.08.20	1	48	10	Control	34	48	17	27.89
2020.08.20	1	48	10	Control	28	45	14	11.09
2020.08.20	1	48	10	Control	41	60	21	28.31
2020.08.22	2	48	10	Control	39	59	21	36.55
2020.08.22	2	48	10	Control	40	55	21	31.88
2020.08.22	2	48	10	Control	42	61	21	51.11
2020.08.22	2	48	10	Control	40	51	21	35.66
2020.08.22	2	48	10	Control	40	50	21	13.041
2020.08.22	2	48	10	Control	40	51	21	37.64
2020.08.22	2	48	10	Control	47	69	25	42.19
2020.08.22	2	48	10	Control	48	69	25	35.11
2020.08.22	2	48	10	Control	47	65	25	46.77
2020.08.22	2	48	10	Control	49	69	26	57.28
2020.08.22	2	48	10	Control	45	63	25	45.63
2020.08.22	2	48	10	Control	52	73	29	68.97
2020.08.22	2	48	10	Control	58	79	31	80.58
2020.08.22	2	48	10	Control	55	78	30	92.4
2020.08.22	2	48	10	Control	52	83	29	84.13
2020.08.22	2	48	10	Control	60	81	34	99.3
2020.08.22	2	48	10	Control	63	88	36	207.89
2020.08.22	2	48	10	Control	72	87	43	115.63
2020.08.22	2	48	10	70×20 mm	31	52	15	25.09
2020.08.22	2	48	10	70×20 mm	40	51	21	25.69
2020.08.22	2	48	10	70×20 mm	42	58	22	38.78
2020.08.22	2	48	10	70×20 mm	42	62	22	41.17
2020.08.22	2	48	10	70×20 mm	41	56	21	51.03
2020.08.22	2	48	10	70×20 mm	52	72	26	34.7
2020.08.22	2	48	10	70×20 mm	44	62	23	33.98
2020.08.22	2	48	10	70×20 mm	45	59	24	40.55
2020.08.22	2	48	10	70×20 mm	49	68	26	58.98
2020.08.22	2	48	10	70×20 mm	55	76	31	79.81
2020.08.22	2	48	10	70×20 mm	52	73	28	57.69
2020.08.22	2	48	10	70×20 mm	56	76	31	90.42
2020.08.22	2	48	10	70×20 mm	61	83	33	102.43
2020.08.22	2	48	10	70×20 mm	65	94	36	188.79
2020.08.22	2	48	10	70×25 mm	40	51	19	18.35
2020.08.22	2	48	10	70×25 mm	51	71	26	62.34
2020.08.22	2	48	10	70×25 mm	47	68	26	33.42
2020.08.22	2	48	10	70×25 mm	45	61	23	44.18
2020.08.22	2	48	10	70×25 mm	49	68	27	54.65
2020.08.22	2	48	10	70×25 mm	57	77	31	82.76
2020.08.22	2	48	10	70×25 mm	51	72	29	63.22
2020.08.22	2	48	10	70×25 mm	53	72	31	106.78
2020.08.22	2	48	10	70×25 mm	60	84	35	117.98
2020.08.22	2	48	10	70×25 mm	59	77	33	153
2020.08.22	2	48	10	70×25 mm	61	83	33	152.43
2020.08.22	2	48	10	70×30 mm	52	73	27	56.43
2020.08.22	2	48	10	70×30 mm	52	72	29	54.98
2020.08.22	2	48	10	70×30 mm	49	70	28	77.26
2020.08.22	2	48	10	70×30 mm	50	75	28	62.51
2020.08.22	2	48	10	70×30 mm	65	88	37	105.93
2020.08.22	2	48	10	70×30 mm	60	81	34	129.36
2020.08.22	2	48	10	70×30 mm	73	104	40	245.91
2020.08.22	2	48	10	70×35 mm	58	79	31	82.19
2020.08.22	2	48	10	70×35 mm	60	96	34	145.09
2020.08.22	2	48	10	70×35 mm	61	81	34	100.23
2020.08.22	2	48	10	Control	52	71	29	53.49
2020.08.22	2	48	10	Control	64	88	36	212.21
2020.08.22	2	48	10	Control	67	95	37	188.93
2020.08.22	2	48	10	70×20 mm	57	77	31	83.1
2020.08.22	2	48	10	70×20 mm	63	87	36	218.97
2020.08.22	2	48	10	70×20 mm	63	85	36	215.87
2020.08.22	2	48	10	70×25 mm	52	74	29	73.2
2020.08.22	2	48	10	70×25 mm	65	89	37	184.32
2020.08.22	2	48	10	70×25 mm	64	86	36	93.38
2020.08.22	2	48	10	70×30 mm	51	70	26	61.78
2020.08.22	2	48	10	70×30 mm	52	71	29	63.42
2020.08.22	2	48	10	70×30 mm	60	79	34	132.53
2020.08.22	2	48	10	70×35 mm	64	92	35	176.43
2020.08.22	2	48	10	70×35 mm	59	77	33	153.49
2020.08.22	2	48	10	70×35 mm	58	78	31	99.01
2020.08.22	2	48	10	70×35 mm	57	78	31	99.26
2020.08.24	3	48	10	Control	23	34	12	7.09
2020.08.24	3	48	10	Control	24	34	12	6.77
2020.08.24	3	48	10	Control	37	56	17	32.58
2020.08.24	3	48	10	Control	35	47	17	17.58
2020.08.24	3	48	10	Control	33	43	16	10.79
2020.08.24	3	48	10	Control	39	54	22	23.99
2020.08.24	3	48	10	Control	41	60	22	36.75
2020.08.24	3	48	10	Control	40	57	22	25.02
2020.08.24	3	48	10	Control	40	63	21	49.35
2020.08.24	3	48	10	Control	40	58	22	45.28
2020.08.24	3	48	10	Control	40	50	22	30.21
2020.08.24	3	48	10	Control	40	58	22	52.43
2020.08.24	3	48	10	Control	45	57	23	34.91
2020.08.24	3	48	10	Control	41	56	23	23.75
2020.08.24	3	48	10	Control	48	67	26	62.36
2020.08.24	3	48	10	Control	40	57	23	34.79
2020.08.24	3	48	10	Control	42	60	23	34.46
2020.08.24	3	48	10	Control	57	77	31	80.56
2020.08.24	3	48	10	Control	51	72	29	59.26
2020.08.24	3	48	10	Control	54	75	31	101.84
2020.08.24	3	48	10	Control	50	68	28	94.32
2020.08.24	3	48	10	Control	59	89	33	143.96
2020.08.24	3	48	10	Control	64	89	36	90.79
2020.08.24	3	48	10	Control	69	85	41	190.11
2020.08.24	3	48	10	70×20 mm	32	41	15	20.2
2020.08.24	3	48	10	70×20 mm	47	68	22	30.29
2020.08.24	3	48	10	70×20 mm	41	54	22	32.79
2020.08.24	3	48	10	70×20 mm	42	62	21	43.3
2020.08.24	3	48	10	70×20 mm	39	50	20	39.46
2020.08.24	3	48	10	70×20 mm	47	70	25	40.86
2020.08.24	3	48	10	70×20 mm	48	70	25	35.09
2020.08.24	3	48	10	70×20 mm	47	65	25	47.21
2020.08.24	3	48	10	70×20 mm	52	73	29	65.34
2020.08.24	3	48	10	70×20 mm	52	73	29	55.1
2020.08.24	3	48	10	70×20 mm	49	70	28	77.6
2020.08.24	3	48	10	70×20 mm	50	66	28	60.21
2020.08.24	3	48	10	70×20 mm	64	87	37	120.78
2020.08.24	3	48	10	70×20 mm	60	78	34	159.39
2020.08.24	3	48	10	70×25 mm	42	56	21	32.08
2020.08.24	3	48	10	70×25 mm	52	65	26	35.63
2020.08.24	3	48	10	70×25 mm	44	57	23	32.19
2020.08.24	3	48	10	70×25 mm	45	59	24	40.19
2020.08.24	3	48	10	70×25 mm	44	65	24	39.28
2020.08.24	3	48	10	70×25 mm	55	74	30	58.87
2020.08.24	3	48	10	70×25 mm	57	78	31	101.09
2020.08.24	3	48	10	70×25 mm	53	84	30	111.98
2020.08.24	3	48	10	70×25 mm	63	84	36	179.87
2020.08.24	3	48	10	70×25 mm	66	88	37	181
2020.08.24	3	48	10	70×25 mm	75	110	43	261.09
2020.08.24	3	48	10	70×30 mm	49	57	25	33.73
2020.08.24	3	48	10	70×30 mm	58	79	31	81.62
2020.08.24	3	48	10	70×30 mm	55	78	30	94.28
2020.08.24	3	48	10	70×30 mm	52	71	29	87.12
2020.08.24	3	48	10	70×30 mm	60	79	34	101.08
2020.08.24	3	48	10	70×30 mm	64	87	37	157.98
2020.08.24	3	48	10	70×35 mm	62	82	34	110.87
2020.08.24	3	48	10	70×35 mm	64	86	36	120.87
2020.08.24	3	48	10	Control	58	79	31	80.74
2020.08.24	3	48	10	Control	63	86	36	92.38
2020.08.24	3	48	10	Control	64	100	36	180.91
2020.08.24	3	48	10	70×20 mm	55	73	30	58.71
2020.08.24	3	48	10	70×20 mm	65	89	36	97.27
2020.08.24	3	48	10	70×20 mm	66	88	36	92.73
2020.08.24	3	48	10	70×25 mm	57	77	31	78.92
2020.08.24	3	48	10	70×25 mm	64	94	37	194.56
2020.08.24	3	48	10	70×25 mm	69	90	41	195.47
2020.08.24	3	48	10	70×30 mm	52	71	26	36.11
2020.08.24	3	48	10	70×30 mm	65	85	37	111.35
2020.08.24	3	48	10	70×30 mm	64	89	37	160.92
2020.08.24	3	48	10	70×35 mm	60	80	34	104.58
2020.08.24	3	48	10	70×35 mm	63	92	35	150.87
2020.08.24	3	48	10	70×35 mm	58	79	31	86.21
2020.08.24	3	48	10	70×35 mm	58	77	32	83.45
2020.08.26	4	47	10	Control	18	25	9	3.12
2020.08.26	4	47	10	Control	17	25	9	3.31
2020.08.26	4	47	10	Control	26	37	11	7.02
2020.08.26	4	47	10	Control	32	94	15	198.9
2020.08.26	4	47	10	Control	35	46	17	14.86
2020.08.26	4	47	10	Control	26	48	17	18.36
2020.08.26	4	47	10	Control	40	51	20	21.14
2020.08.26	4	47	10	Control	39	53	21	31.97
2020.08.26	4	47	10	Control	38	58	20	42.87
2020.08.26	4	47	10	Control	41	60	22	33.68
2020.08.26	4	47	10	Control	39	52	21	43.01
2020.08.26	4	47	10	Control	39	53	20	25.5
2020.08.26	4	47	10	Control	40	51	22	27.88
2020.08.26	4	47	10	Control	51	71	26	47.09
2020.08.26	4	47	10	Control	50	70	26	55.5
2020.08.26	4	47	10	Control	48	69	25	59.38
2020.08.26	4	47	10	Control	42	61	23	29.81
2020.08.26	4	47	10	Control	45	62	25	47.89
2020.08.26	4	47	10	Control	55	74	30	60.12
2020.08.26	4	47	10	Control	57	79	31	95.16
2020.08.26	4	47	10	Control	53	71	30	106.07
2020.08.26	4	47	10	Control	53	74	30	81.06
2020.08.26	4	47	10	Control	60	82	33	125.74
2020.08.26	4	47	10	Control	59	82	33	102.91
2020.08.26	4	47	10	70×20 mm	17	25	9	3.09
2020.08.26	4	47	10	70×20 mm	29	45	14	12.28
2020.08.26	4	47	10	70×20 mm	46	62	20	37.09
2020.08.26	4	47	10	70×20 mm	40	53	21	25.93
2020.08.26	4	47	10	70×20 mm	40	60	20	42.15
2020.08.26	4	47	10	70×20 mm	40	61	20	35.68
2020.08.26	4	47	10	70×20 mm	44	63	23	28.9
2020.08.26	4	47	10	70×20 mm	41	60	23	24.37
2020.08.26	4	47	10	70×20 mm	48	67	26	63.43
2020.08.26	4	47	10	70×20 mm	51	72	29	68.79
2020.08.26	4	47	10	70×20 mm	58	79	31	82.53
2020.08.26	4	47	10	70×20 mm	55	75	30	98.27
2020.08.26	4	47	10	70×20 mm	52	70	29	85.21
2020.08.26	4	47	10	70×20 mm	62	83	34	99.87
2020.08.26	4	47	10	70×20 mm	78	114	43	314.89
2020.08.26	4	47	10	70×25 mm	29	40	15	8.93
2020.08.26	4	47	10	70×25 mm	39	52	22	26.19
2020.08.26	4	47	10	70×25 mm	47	69	25	42.31
2020.08.26	4	47	10	70×25 mm	48	62	25	35.76
2020.08.26	4	47	10	70×25 mm	47	65	25	45.86
2020.08.26	4	47	10	70×25 mm	53	74	28	56.36
2020.08.26	4	47	10	70×25 mm	53	74	28	65.23
2020.08.26	4	47	10	70×25 mm	55	74	31	79.99
2020.08.26	4	47	10	70×25 mm	55	75	31	79.83
2020.08.26	4	47	10	70×25 mm	63	82	36	211.87
2020.08.26	4	47	10	70×30 mm	43	64	23	32.25
2020.08.26	4	47	10	70×30 mm	51	71	27	53.11
2020.08.26	4	47	10	70×30 mm	51	72	29	59.09
2020.08.26	4	47	10	70×30 mm	54	80	31	108.92
2020.08.26	4	47	10	70×30 mm	51	70	28	96.79
2020.08.26	4	47	10	70×30 mm	67	95	37	156.23
2020.08.26	4	47	10	70×30 mm	63	93	36	159.89
2020.08.26	4	47	10	70×35 mm	45	66	25	56.05
2020.08.26	4	47	10	70×35 mm	60	81	33	120.32
2020.08.26	4	47	10	70×35 mm	65	88	37	151
2020.08.26	4	47	10	Control	57	77	31	86.32
2020.08.26	4	47	10	Control	51	72	29	58.67
2020.08.26	4	47	10	Control	69	91	41	198.78
2020.08.26	4	47	10	Control	63	82	36	177.65
2020.08.26	4	47	10	70×20 mm	50	69	26	54.87
2020.08.26	4	47	10	70×20 mm	53	73	28	64.82
2020.08.26	4	47	10	70×20 mm	66	85	37	125.63
2020.08.26	4	47	10	70×20 mm	67	88	37	121.87
2020.08.26	4	47	10	70×25 mm	50	72	26	27.3
2020.08.26	4	47	10	70×25 mm	55	67	30	59.39
2020.08.26	4	47	10	70×25 mm	63	85	36	210.95
2020.08.26	4	47	10	70×25 mm	65	85	37	124.43
2020.08.26	4	47	10	70×30 mm	50	69	28	102.87
2020.08.26	4	47	10	70×30 mm	51	69	26	48.12
2020.08.26	4	47	10	70×30 mm	60	79	34	96.55
2020.08.26	4	47	10	70×30 mm	63	87	36	157.81
2020.08.26	4	47	10	70×35 mm	49	67	26	59.72
2020.08.26	4	47	10	70×35 mm	62	82	35	150.74
2020.08.26	4	47	10	70×35 mm	57	78	31	100.74
2020.08.26	4	47	10	Control	26	37	11	7.72
2020.08.26	4	47	10	Control	27	37	11	8.09
2020.08.26	4	47	10	Control	29	38	12	7.69
2020.08.26	4	47	10	Control	35	50	16	24.22
2020.08.26	4	47	10	Control	31	45	15	23.03
2020.08.26	4	47	10	Control	35	49	17	17.41
2020.08.26	4	47	10	Control	38	52	19	15.18
2020.08.26	4	47	10	Control	38	52	20	24.03
2020.08.26	4	47	10	Control	43	62	22	45.6
2020.08.26	4	47	10	Control	36	55	18	37.85
2020.08.26	4	47	10	Control	37	48	19	26.84
2020.08.26	4	47	10	Control	37	48	19	29.15
2020.08.26	4	47	10	Control	41	52	21	24.84
2020.08.26	4	47	10	Control	52	72	27	56.19
2020.08.28	5	48	10	Control	46	61	23	45.41
2020.08.28	5	48	10	Control	45	64	25	45.64
2020.08.28	5	48	10	Control	50	68	27	38.05
2020.08.28	5	48	10	Control	46	64	25	45.18
2020.08.28	5	48	10	Control	53	72	28	65.41
2020.08.28	5	48	10	Control	55	74	31	80.16
2020.08.28	5	48	10	Control	55	75	31	72.55
2020.08.28	5	48	10	Control	52	73	29	93.07
2020.08.28	5	48	10	Control	60	82	33	104.4
2020.08.28	5	48	10	Control	60	85	34	158.11
2020.08.28	5	48	10	70×20 mm	25	37	11	8.11
2020.08.28	5	48	10	70×20 mm	33	43	16	11.14
2020.08.28	5	48	10	70×20 mm	39	56	21	34.17
2020.08.28	5	48	10	70×20 mm	40	55	21	33.29
2020.08.28	5	48	10	70×20 mm	42	62	21	51.98
2020.08.28	5	48	10	70×20 mm	40	51	21	37.62
2020.08.28	5	48	10	70×20 mm	51	69	26	46.25
2020.08.28	5	48	10	70×20 mm	50	68	26	57.68
2020.08.28	5	48	10	70×20 mm	48	69	25	59.99
2020.08.28	5	48	10	70×20 mm	57	77	31	84.35
2020.08.28	5	48	10	70×20 mm	51	72	29	60.13
2020.08.28	5	48	10	70×20 mm	54	75	31	104.67
2020.08.28	5	48	10	70×20 mm	66	88	37	115.76
2020.08.28	5	48	10	70×20 mm	67	95	37	186.73
2020.08.28	5	48	10	70×20 mm	73	103	40	235.42
2020.08.28	5	48	10	70×25 mm	26	35	15	8.42
2020.08.28	5	48	10	70×25 mm	40	51	20	19.73
2020.08.28	5	48	10	70×25 mm	44	64	23	30.19
2020.08.28	5	48	10	70×25 mm	41	62	23	29.88
2020.08.28	5	48	10	70×25 mm	48	67	26	67.89
2020.08.28	5	48	10	70×25 mm	57	78	31	66.43
2020.08.28	5	48	10	70×25 mm	52	67	28	59.82
2020.08.28	5	48	10	70×25 mm	55	77	31	103.67
2020.08.28	5	48	10	70×25 mm	55	83	31	112.8
2020.08.28	5	48	10	70×25 mm	61	81	37	106.54
2020.08.28	5	48	10	70×30 mm	45	61	24	41.64
2020.08.28	5	48	10	70×30 mm	50	61	26	29.28
2020.08.28	5	48	10	70×30 mm	57	79	31	103.42
2020.08.28	5	48	10	70×30 mm	53	80	30	108.78
2020.08.28	5	48	10	70×30 mm	53	72	30	84.27
2020.08.28	5	48	10	70×30 mm	64	100	36	130.68
2020.08.28	5	48	10	70×30 mm	64	86	36	160.98
2020.08.28	5	48	10	70×35 mm	53	72	28	66.71
2020.08.28	5	48	10	70×35 mm	63	92	35	100.77
2020.08.28	5	48	10	70×35 mm	64	94	37	120.99
2020.08.28	5	48	10	Control	55	79	30	61.42
2020.08.28	5	48	10	Control	57	78	31	101.72
2020.08.28	5	48	10	Control	66	87	37	119.87
2020.08.28	5	48	10	Control	74	87	43	123.9
2020.08.28	5	48	10	70×20 mm	53	74	27	66.81
2020.08.28	5	48	10	70×20 mm	52	68	28	56.9
2020.08.28	5	48	10	70×20 mm	65	90	37	182.32
2020.08.28	5	48	10	70×20 mm	65	86	37	120.53
2020.08.28	5	48	10	70×25 mm	50	68	26	56.77
2020.08.28	5	48	10	70×25 mm	53	73	28	63.79
2020.08.28	5	48	10	70×25 mm	63	89	36	98.23
2020.08.28	5	48	10	70×25 mm	59	80	34	103.32
2020.08.28	5	48	10	70×30 mm	53	75	30	82.37
2020.08.28	5	48	10	70×30 mm	52	69	27	61.86
2020.08.28	5	48	10	70×30 mm	67	95	37	159.61
2020.08.28	5	48	10	70×30 mm	64	87	36	168.05
2020.08.28	5	48	10	70×35 mm	48	65	26	55.03
2020.08.28	5	48	10	70×35 mm	64	86	36	180.37
2020.08.28	5	48	10	70×35 mm	57	80	32	82.65
2020.08.30	6	48	10	Control	28	38	12	7.27
2020.08.30	6	48	10	Control	28	38	12	6.99
2020.08.30	6	48	10	Control	21	30	11	4.9
2020.08.30	6	48	10	Control	28	41	13	13.36
2020.08.30	6	48	10	Control	34	48	17	23.7
2020.08.30	6	48	10	Control	34	45	17	14.44
2020.08.30	6	48	10	Control	44	63	22	37.61
2020.08.30	6	48	10	Control	41	61	22	30.17
2020.08.30	6	48	10	Control	40	60	21	38.64
2020.08.30	6	48	10	Control	40	57	21	41.18
2020.08.30	6	48	10	Control	40	50	22	28.07
2020.08.30	6	48	10	Control	40	50	22	25.37
2020.08.30	6	48	10	Control	39	44	21	70.45
2020.08.30	6	48	10	Control	49	70	25	36.7
2020.08.30	6	48	10	Control	45	59	23	35.42
2020.08.30	6	48	10	Control	48	66	26	55.6
2020.08.30	6	48	10	Control	43	58	24	29.21
2020.08.30	6	48	10	Control	47	70	26	76.39
2020.08.30	6	48	10	Control	52	68	28	55.79
2020.08.30	6	48	10	Control	55	77	31	95.24
2020.08.30	6	48	10	Control	55	83	31	111.64
2020.08.30	6	48	10	Control	55	80	31	81.27
2020.08.30	6	48	10	Control	62	81	35	145.8
2020.08.30	6	48	10	Control	65	85	37	113.63
2020.08.30	6	48	10	70×20 mm	28	38	12	7.1
2020.08.30	6	48	10	70×20 mm	26	48	17	19.56
2020.08.30	6	48	10	70×20 mm	41	56	22	33.31
2020.08.30	6	48	10	70×20 mm	40	61	22	27.08
2020.08.30	6	48	10	70×20 mm	40	63	21	50.19
2020.08.30	6	48	10	70×20 mm	40	58	22	45.12
2020.08.30	6	48	10	70×20 mm	52	73	27	57.19
2020.08.30	6	48	10	70×20 mm	46	61	23	45.29
2020.08.30	6	48	10	70×20 mm	45	64	25	48.59
2020.08.30	6	48	10	70×20 mm	55	73	30	57.84
2020.08.30	6	48	10	70×20 mm	57	78	31	96.78
2020.08.30	6	48	10	70×20 mm	53	80	30	109.09
2020.08.30	6	48	10	70×20 mm	59	80	34	101.98
2020.08.30	6	48	10	70×20 mm	64	100	36	172.64
2020.08.30	6	48	10	70×25 mm	27	38	13	8.57
2020.08.30	6	48	10	70×25 mm	38	52	19	14.57
2020.08.30	6	48	10	70×25 mm	51	69	26	46.72
2020.08.30	6	48	10	70×25 mm	50	66	26	54.82
2020.08.30	6	48	10	70×25 mm	48	69	25	60.88
2020.08.30	6	48	10	70×25 mm	52	71	29	48.21
2020.08.30	6	48	10	70×25 mm	58	78	31	93.76
2020.08.30	6	48	10	70×25 mm	56	80	32	79.87
2020.08.30	6	48	10	70×25 mm	51	70	28	82.31
2020.08.30	6	48	10	70×25 mm	66	94	36	178.9
2020.08.30	6	48	10	70×30 mm	51	71	26	59.62
2020.08.30	6	48	10	70×30 mm	47	68	26	28.77
2020.08.30	6	48	10	70×30 mm	55	74	31	80.18
2020.08.30	6	48	10	70×30 mm	55	75	31	74.94
2020.08.30	6	48	10	70×30 mm	52	73	29	95.28
2020.08.30	6	48	10	70×30 mm	59	84	35	123.98
2020.08.30	6	48	10	70×30 mm	59	77	33	155.65
2020.08.30	6	48	10	70×35 mm	52	68	28	53.99
2020.08.30	6	48	10	70×35 mm	60	79	34	98.08
2020.08.30	6	48	10	70×35 mm	63	84	36	119.08
2020.08.30	6	48	10	Control	53	73	28	68.91
2020.08.30	6	48	10	Control	55	74	31	84.87
2020.08.30	6	48	10	Control	65	91	37	189.09
2020.08.30	6	48	10	Control	73	103	40	231.98
2020.08.30	6	48	10	70×20 mm	50	70	26	60.49
2020.08.30	6	48	10	70×20 mm	57	78	31	93.28
2020.08.30	6	48	10	70×20 mm	65	93	36	208.67
2020.08.30	6	48	10	70×20 mm	64	100	36	178.56
2020.08.30	6	48	10	70×25 mm	53	74	27	65.73
2020.08.30	6	48	10	70×25 mm	52	68	28	57.82
2020.08.30	6	48	10	70×25 mm	60	85	34	165.48
2020.08.30	6	48	10	70×25 mm	65	89	37	185.42
2020.08.30	6	48	10	70×30 mm	52	73	29	105.78
2020.08.30	6	48	10	70×30 mm	50	70	27	51.99
2020.08.30	6	48	10	70×30 mm	64	100	36	136.57
2020.08.30	6	48	10	70×30 mm	66	88	37	169.54
2020.08.30	6	48	10	70×35 mm	48	69	26	80.21
2020.08.30	6	48	10	70×35 mm	65	93	37	152.07
2020.08.30	6	48	10	70×35 mm	58	84	35	118.7
2020.08.30	6	48	10	Control	71	100	41	181.63
2020.08.30	6	48	10	70×20 mm	65	90	38	185.22
2020.08.30	6	48	10	70×30 mm	66	87	38	120.82
2020.08.30	6	48	10	70×30 mm	69	91	41	195.68
2020.08.30	6	48	10	70×35 mm	73	103	39	180.21
2020.08.30	6	48	10	70×20 mm	75	110	43	270.87
2020.08.30	6	48	10	70×30 mm	78	114	44	309.75
2020.08.30	6	48	10	70×35 mm	78	114	45	250.98
2020.09.01	7	49	10	Control	18	25	10	3.05
2020.09.01	7	49	10	Control	18	25	10	3.2
2020.09.01	7	49	10	Control	33	44	17	15.46
2020.09.01	7	49	10	Control	34	46	16	19.77
2020.09.01	7	49	10	Control	35	47	17	18.07
2020.09.01	7	49	10	Control	26	35	13	7.39
2020.09.01	7	49	10	Control	43	56	22	32.45
2020.09.01	7	49	10	Control	43	55	22	36.09
2020.09.01	7	49	10	Control	42	66	22	63.83
2020.09.01	7	49	10	Control	42	61	22	28.76
2020.09.01	7	49	10	Control	36	58	18	43.87
2020.09.01	7	49	10	Control	40	57	22	39.09
2020.09.01	7	49	10	Control	39	54	21	31.51
2020.09.01	7	49	10	Control	51	71	27	52.89
2020.09.01	7	49	10	Control	53	74	27	65.93
2020.09.01	7	49	10	Control	43	64	23	36.81
2020.09.01	7	49	10	Control	43	58	25	29.87
2020.09.01	7	49	10	Control	47	66	27	59.36
2020.09.01	7	49	10	Control	58	78	31	92.71
2020.09.01	7	49	10	Control	57	80	32	80.02
2020.09.01	7	49	10	Control	50	71	28	79.95
2020.09.01	7	49	10	Control	52	72	30	90.2
2020.09.01	7	49	10	Control	60	96	34	199.7
2020.09.01	7	49	10	Control	60	82	34	95.64
2020.09.01	7	49	10	70×20 mm	19	25	9	2.98
2020.09.01	7	49	10	70×20 mm	40	51	20	23.55
2020.09.01	7	49	10	70×20 mm	39	53	21	26.25
2020.09.01	7	49	10	70×20 mm	38	55	20	43.29
2020.09.01	7	49	10	70×20 mm	41	60	22	34.01
2020.09.01	7	49	10	70×20 mm	40	50	22	30.12
2020.09.01	7	49	10	70×20 mm	49	71	25	34.88
2020.09.01	7	49	10	70×20 mm	45	59	23	35.01
2020.09.01	7	49	10	70×20 mm	48	66	26	55.98
2020.09.01	7	49	10	70×20 mm	53	74	28	68.77
2020.09.01	7	49	10	70×20 mm	55	74	31	83.19
2020.09.01	7	49	10	70×20 mm	55	75	31	73.21
2020.09.01	7	49	10	70×20 mm	65	90	37	183.58
2020.09.01	7	49	10	70×20 mm	58	84	35	116.95
2020.09.01	7	49	10	70×25 mm	20	30	11	5.03
2020.09.01	7	49	10	70×25 mm	44	62	22	34.73
2020.09.01	7	49	10	70×25 mm	52	71	27	57.77
2020.09.01	7	49	10	70×25 mm	45	63	23	45.37
2020.09.01	7	49	10	70×25 mm	45	64	25	46.12
2020.09.01	7	49	10	70×25 mm	51	64	28	38.63
2020.09.01	7	49	10	70×25 mm	50	70	28	60.92
2020.09.01	7	49	10	70×25 mm	54	75	29	65.48
2020.09.01	7	49	10	70×25 mm	65	85	37	114.33
2020.09.01	7	49	10	70×25 mm	60	81	34	166.87
2020.09.01	7	49	10	70×30 mm	52	69	26	36.08
2020.09.01	7	49	10	70×30 mm	44	57	23	31.62
2020.09.01	7	49	10	70×30 mm	55	77	31	98.01
2020.09.01	7	49	10	70×30 mm	55	83	31	115.43
2020.09.01	7	49	10	70×30 mm	55	80	31	85.76
2020.09.01	7	49	10	70×30 mm	63	82	36	182.37
2020.09.01	7	49	10	70×30 mm	66	87	37	162.01
2020.09.01	7	49	10	70×35 mm	58	79	31	94.78
2020.09.01	7	49	10	70×35 mm	59	89	33	123.09
2020.09.01	7	49	10	70×35 mm	64	89	36	89.98
2020.09.01	7	49	10	70×35 mm	65	93	37	150.9
2020.09.01	7	49	10	Control	52	71	28	56.41
2020.09.01	7	49	10	Control	55	77	31	99.08
2020.09.01	7	49	10	Control	63	93	36	213.23
2020.09.01	7	49	10	70×20 mm	50	68	27	40.11
2020.09.01	7	49	10	70×20 mm	50	70	28	62.12
2020.09.01	7	49	10	70×20 mm	64	86	36	95.63
2020.09.01	7	49	10	70×20 mm	63	83	36	177.44
2020.09.01	7	49	10	70×25 mm	50	69	26	59.68
2020.09.01	7	49	10	70×25 mm	58	78	31	95.45
2020.09.01	7	49	10	70×25 mm	63	85	37	117.67
2020.09.01	7	49	10	70×25 mm	73	103	40	230.09
2020.09.01	7	49	10	70×30 mm	55	80	31	83.62
2020.09.01	7	49	10	70×30 mm	50	66	26	28.69
2020.09.01	7	49	10	70×30 mm	63	84	36	179.88
2020.09.01	7	49	10	70×30 mm	73	103	40	226.78
2020.09.01	7	49	10	70×35 mm	67	94	37	140.87
2020.09.01	7	49	10	70×35 mm	62	85	35	151.33
2020.09.01	7	49	10	70×35 mm	64	94	37	149.87
2020.09.01	7	49	10	Control	65	85	38	118.65
2020.09.01	7	49	10	70×20 mm	64	85	39	119.67
2020.09.01	7	49	10	70×30 mm	71	101	39	219.87
2020.09.01	7	49	10	70×35 mm	68	87	38	180.65
2020.09.01	7	49	10	70×35 mm	75	106	40	200.87
2020.09.01	7	49	10	Control	78	114	44	300.98
2020.09.01	7	49	10	70×35 mm	75	110	43	239.87
2020.09.01	7	49	10	70×35 mm	75	110	43	256.26
2020.09.01	7	49	10	70×30 mm	75	110	43	276.38
2020.09.01	7	49	10	Control	21	30	11	4.62
2020.09.01	7	49	10	Control	21	30	11	4.44
2020.09.01	7	49	10	Control	31	42	15	15.27
2020.09.01	7	49	10	Control	34	55	17	36.06
2020.09.01	7	49	10	Control	35	46	17	16.01
2020.09.01	7	49	10	Control	34	45	17	15.49
2020.09.01	7	49	10	Control	40	51	21	24.25
2020.09.03	8	47	10	Control	42	59	22	36.79
2020.09.03	8	47	10	Control	42	58	22	36.88
2020.09.03	8	47	10	Control	41	54	21	52.45
2020.09.03	8	47	10	Control	38	56	18	47.98
2020.09.03	8	47	10	Control	41	53	21	41.23
2020.09.03	8	47	10	Control	42	54	22	34.32
2020.09.03	8	47	10	Control	50	70	26	33.54
2020.09.03	8	47	10	Control	50	69	26	59.77
2020.09.03	8	47	10	Control	48	64	25	44.02
2020.09.03	8	47	10	Control	48	66	26	54.73
2020.09.03	8	47	10	Control	45	62	24	35.56
2020.09.03	8	47	10	Control	50	67	28	61.75
2020.09.03	8	47	10	Control	54	75	29	65.18
2020.09.03	8	47	10	Control	55	76	30	97.01
2020.09.03	8	47	10	Control	62	85	34	146.04
2020.09.03	8	47	10	Control	64	86	36	171.99
2020.09.03	8	47	10	Control	65	91	37	181.97
2020.09.03	8	47	10	Control	71	87	41	175.26
2020.09.03	8	47	10	70×20 mm	34	48	17	25.36
2020.09.03	8	47	10	70×20 mm	38	52	19	15.9
2020.09.03	8	47	10	70×20 mm	38	53	20	22.94
2020.09.03	8	47	10	70×20 mm	43	63	22	46.5
2020.09.03	8	47	10	70×20 mm	36	57	18	38.99
2020.09.03	8	47	10	70×20 mm	36	59	18	41.71
2020.09.03	8	47	10	70×20 mm	52	73	27	53.44
2020.09.03	8	47	10	70×20 mm	53	73	27	67.23
2020.09.03	8	47	10	70×20 mm	43	63	23	37.54
2020.09.03	8	47	10	70×20 mm	52	71	28	57.01
2020.09.03	8	47	10	70×20 mm	55	77	31	97.89
2020.09.03	8	47	10	70×20 mm	55	83	31	114.57
2020.09.03	8	47	10	70×20 mm	63	95	36	211.21
2020.09.03	8	47	10	70×20 mm	63	84	36	186.79
2020.09.03	8	47	10	70×25 mm	19	28	10	5.05
2020.09.03	8	47	10	70×25 mm	43	56	22	31.9
2020.09.03	8	47	10	70×25 mm	49	69	25	35.03
2020.09.03	8	47	10	70×25 mm	45	59	23	34.93
2020.09.03	8	47	10	70×25 mm	48	66	26	56.85
2020.09.03	8	47	10	70×25 mm	55	74	30	58.62
2020.09.03	8	47	10	70×25 mm	56	76	31	77.93
2020.09.03	8	47	10	70×25 mm	52	72	28	58.42
2020.09.03	8	47	10	70×25 mm	58	79	34	104.62
2020.09.03	8	47	10	70×25 mm	64	93	37	178
2020.09.03	8	47	10	70×30 mm	47	66	25	41.34
2020.09.03	8	47	10	70×30 mm	58	78	31	97.91
2020.09.03	8	47	10	70×30 mm	57	80	32	80.57
2020.09.03	8	47	10	70×30 mm	50	75	28	87.98
2020.09.03	8	47	10	70×30 mm	63	86	36	93.26
2020.09.03	8	47	10	70×30 mm	63	84	36	165.98
2020.09.03	8	47	10	70×30 mm	61	83	33	150.96
2020.09.03	8	47	10	70×35 mm	50	70	28	62.93
2020.09.03	8	47	10	70×35 mm	60	81	33	127.89
2020.09.03	8	47	10	70×35 mm	61	82	33	105.68
2020.09.03	8	47	10	70×35 mm	72	87	43	124.65
2020.09.03	8	47	10	Control	58	78	31	98.87
2020.09.03	8	47	10	Control	56	75	32	78.67
2020.09.03	8	47	10	Control	64	88	36	103.28
2020.09.03	8	47	10	70×20 mm	55	75	30	59.87
2020.09.03	8	47	10	70×20 mm	56	76	31	76.9
2020.09.03	8	47	10	70×20 mm	69	90	41	191.01
2020.09.03	8	47	10	70×20 mm	73	104	40	240.81
2020.09.03	8	47	10	70×25 mm	50	67	27	39.07
2020.09.03	8	47	10	70×25 mm	50	70	28	62.83
2020.09.03	8	47	10	70×25 mm	60	82	34	98.79
2020.09.03	8	47	10	70×25 mm	73	104	40	245.76
2020.09.03	8	47	10	70×30 mm	52	75	30	91.2
2020.09.03	8	47	10	70×30 mm	50	71	26	58.91
2020.09.03	8	47	10	70×30 mm	63	85	36	171.09
2020.09.03	8	47	10	70×30 mm	75	110	43	262.17
2020.09.03	8	47	10	70×35 mm	65	88	37	151.97
2020.09.03	8	47	10	70×35 mm	57	79	31	104.76
2020.09.03	8	47	10	70×35 mm	63	94	36	160.78
2020.09.05	9	48	10	Control	21	28	10	4.54
2020.09.05	9	48	10	Control	20	28	10	5.6
2020.09.05	9	48	10	Control	30	40	16	12.02
2020.09.05	9	48	10	Control	31	41	14	11.16
2020.09.05	9	48	10	Control	31	47	15	21.79
2020.09.05	9	48	10	Control	33	46	17	17.36
2020.09.05	9	48	10	Control	46	67	22	26.94
2020.09.05	9	48	10	Control	41	54	22	35.91
2020.09.05	9	48	10	Control	42	61	21	44.01
2020.09.05	9	48	10	Control	39	50	20	40.98
2020.09.05	9	48	10	Control	40	55	21	26.98
2020.09.05	9	48	10	Control	39	50	20	28.06
2020.09.05	9	48	10	Control	51	69	26	60.02
2020.09.05	9	48	10	Control	47	66	26	29.7
2020.09.05	9	48	10	Control	45	65	23	40.22
2020.09.05	9	48	10	Control	49	68	27	55.08
2020.09.05	9	48	10	Control	45	63	25	57.11
2020.09.05	9	48	10	Control	55	76	30	57.55
2020.09.05	9	48	10	Control	57	76	31	78.68
2020.09.05	9	48	10	Control	52	72	28	58.03
2020.09.05	9	48	10	Control	56	75	31	89.66
2020.09.05	9	48	10	Control	60	81	33	149.79
2020.09.05	9	48	10	Control	65	92	37	180.47
2020.09.05	9	48	10	Control	64	93	36	210.98
2020.09.05	9	48	10	70×20 mm	35	47	17	17.99
2020.09.05	9	48	10	70×20 mm	44	62	22	35.9
2020.09.05	9	48	10	70×20 mm	41	56	22	33.05
2020.09.05	9	48	10	70×20 mm	40	56	21	40.12
2020.09.05	9	48	10	70×20 mm	40	60	21	38.41
2020.09.05	9	48	10	70×20 mm	45	68	24	40.39
2020.09.05	9	48	10	70×20 mm	50	71	26	28.53
2020.09.05	9	48	10	70×20 mm	50	72	26	62.31
2020.09.05	9	48	10	70×20 mm	48	64	25	45.31
2020.09.05	9	48	10	70×20 mm	58	78	31	97.62
2020.09.05	9	48	10	70×20 mm	58	79	32	81.23
2020.09.05	9	48	10	70×20 mm	50	71	28	82.34
2020.09.05	9	48	10	70×20 mm	64	86	36	91.21
2020.09.05	9	48	10	70×20 mm	65	86	36	209.19
2020.09.05	9	48	10	70×25 mm	41	54	20	30.62
2020.09.05	9	48	10	70×25 mm	40	51	21	25.82
2020.09.05	9	48	10	70×25 mm	51	71	27	52.48
2020.09.05	9	48	10	70×25 mm	53	74	27	65.56
2020.09.05	9	48	10	70×25 mm	43	55	23	37.4
2020.09.05	9	48	10	70×25 mm	52	72	29	66.98
2020.09.05	9	48	10	70×25 mm	52	73	29	56.09
2020.09.05	9	48	10	70×25 mm	49	68	28	80.32
2020.09.05	9	48	10	70×25 mm	67	95	37	190.21
2020.09.05	9	48	10	70×25 mm	63	93	36	177
2020.09.05	9	48	10	70×30 mm	45	65	23	31.98
2020.09.05	9	48	10	70×30 mm	50	70	28	63.41
2020.09.05	9	48	10	70×30 mm	54	75	29	61.69
2020.09.05	9	48	10	70×30 mm	55	74	30	100.98
2020.09.05	9	48	10	70×30 mm	65	85	37	103.63
2020.09.05	9	48	10	70×30 mm	61	82	37	116.89
2020.09.05	9	48	10	70×30 mm	62	80	35	148
2020.09.05	9	48	10	70×35 mm	54	76	31	83.25
2020.09.05	9	48	10	70×35 mm	60	80	33	109.98
2020.09.05	9	48	10	70×35 mm	60	81	34	120.66
2020.09.05	9	48	10	Control	50	70	28	60.81
2020.09.05	9	48	10	Control	67	88	37	122.96
2020.09.05	9	48	10	Control	65	87	37	121.56
2020.09.05	9	48	10	70×20 mm	52	73	29	62.79
2020.09.05	9	48	10	70×20 mm	51	72	29	63.09
2020.09.05	9	48	10	70×20 mm	65	85	37	115.99
2020.09.05	9	48	10	70×20 mm	73	87	43	126.76
2020.09.05	9	48	10	70×25 mm	55	76	30	60.32
2020.09.05	9	48	10	70×25 mm	54	76	31	79.01
2020.09.05	9	48	10	70×25 mm	67	93	37	182.35
2020.09.05	9	48	10	70×25 mm	71	87	43	119.55
2020.09.05	9	48	10	70×30 mm	59	89	33	148.97
2020.09.05	9	48	10	70×30 mm	53	74	27	65.44
2020.09.05	9	48	10	70×30 mm	61	83	37	112.32
2020.09.05	9	48	10	70×35 mm	62	83	34	152.76
2020.09.05	9	48	10	70×35 mm	56	77	32	79.78
2020.09.05	9	48	10	70×35 mm	65	89	36	94.52
